# Supplementary material
Source: publisher figshare collection journal article supplement (https://acs.figshare.com/ndownloader/files/24636265)
Supplement: Supplementary file 1 [file 24636265]

Supporting information for:

## Potential uses of coal methane in China and associated benefits for air quality, health, and climate

*Mingyang Zhang<sup>\*†</sup>, Sarah M. Jordaan<sup>‡</sup>, Wei Peng<sup>§</sup>, Qiang Zhang<sup>||</sup>, Scot M. Miller<sup>†</sup>*

<sup>†</sup>Department of Environmental Health and Engineering, Johns Hopkins University, Baltimore, MD, USA.

<sup>‡</sup>School of Advanced International Studies, Johns Hopkins University, Washington, DC, USA.

<sup>§</sup>School of International Affairs and Department of Civil and Environmental Engineering, Pennsylvania State University, State College, PA, USA.

<sup>||</sup>Ministry of Education Key Laboratory for Earth System Modeling, Center for Earth System Science, Tsinghua University, Beijing, China.

### Corresponding Author:

\*Mingyang Zhang, Phone: 410-516-7095; fax: 410-516-8996; e-mail: [mzhang78@jhu.edu](mailto:mzhang78@jhu.edu)

Number of pages: 19 (including the cover page)

Number of figures: 5

Number of tables: 4

18 **S1 Coal mine methane emissions in China's 13 northern provinces**

19 **Table S1.** Potential CBM/CMM by province (unit: Tg/yr).

20 The table below lists the utilization goals for coalbed methane (CBM) and coal mine  
 21 methane (CMM) for the 8 provinces considered in this study.

| Province                          | 2020FYP |      | 2020NEA |     |
|-----------------------------------|---------|------|---------|-----|
|                                   | CBM     | CMM  | CBM     | CMM |
| Shanxi                            | 5       | 3    | 10.8    | 5.4 |
| Henan                             | 0.07    | 0.2  | 0.1     | 0.2 |
| Anhui                             | 0.07    | 0.4  | -       | 0.4 |
| Heilongjiang                      | 0.07    | -    | -       | -   |
| Liaoning                          | 0.07    | -    | 0.1     | -   |
| Shaanxi                           | -       | 0.1  | 1.1     | 0.1 |
| Inner-Mongolia                    | -       | 0.1  | 1.1     | 0.1 |
| Gansu                             | -       | 0.1  | -       | 0.1 |
| Total in the 8 northern provinces | 5.28    | 3.9  | 13.2    | 6.3 |
| National goals                    | 6       | 4.67 | 13.3    | 8   |

22

## 23 S2 Detailed calculation in the CBM/CMM scenarios

### 24 S2.1 Definition and data source of all variables

25 Note: Table S2 lists the specific data sources for the variables defined below.

#### 26 Emissions factors:

27  $EF_{coal}$ : CO<sub>2</sub> emission factor in coal power generation

28  $EF_{NG}$ : CO<sub>2</sub> emission factor in natural gas power generation

29  $EC_{coal}$ : CO<sub>2</sub> emission coefficients of coal combustion

30  $EC_{NG}$ : CO<sub>2</sub> emission coefficients of natural gas combustion

31 GWP<sub>100</sub>: 100-year global warming potential of methane

#### 32 Heat content and Heat rate by fuel:

33  $HC_{coal\_pow}$ : Heat content of coal in power generation

34  $HC_{coal\_res}$ : Heat content of coal combustion

35  $HC_{NG\_res}$ : Heat content of natural gas in residential combustion

36  $HC_{NG\_pow}$ : Gas heat content of natural gas in power generation

37  $HR_{coal}$ : Heat rate of coal in power generation

38  $HR_{NG}$ : Heat rate of natural gas in power generation

39  $\rho_{CH_4}$ : NG density at standard temperature and pressure (0°C and 1 atm)

#### 40 Efficiency:

41  $\eta_{gas}$ : Heat generation efficiency of the gas stove

42  $\eta_{coal}$ : Heat generation efficiency of the household coal stove

43  $\eta_{electric}$ : Heat generation efficiency of the electricity resistance heaters

44  $\rho_{T\&D\ loss}$ : Transmission and distribution system electricity loss

45  $R$ : Nature gas transmission leakage rate

**Other variables defined in Equation (1)-(10):**

- $CD_{POW}$ : Potential coal displacement in POW scenario (unit: kg)
- $CD_{RES-GAS}$ : Potential coal displacement in RES-GAS scenario (unit: kg)
- $CD_{RES-ELEC}$ : Potential coal displacement in RES-ELEC scenario (unit: kg)
- $CBM_i$ : Total coalbed methane in each province  $i$  (unit: bcm)
- $CMM_i$ : Total coal mine methane emissions in each province  $i$  (unit: bcm)
- $Elec_i$ : Potential electricity generation from CBM/CMM in each province  $i$  (unit: kwh)
- $Heat_i$ : Potential heat supply from CBM/CMM in each province  $i$  (unit: MMBtu)
- $\Delta GHG_j$ : Total reduced GHG emissions from CMM utilization scenario  $j$  (unit: Mt CO<sub>2</sub>eq/yr)
- $\Delta Carbon_j$ : Reduced carbon dioxide emissions from scenario  $j$  compare to the base case (unit: Mt/yr)
- $EF_{eff,i}$ : Effective emission factor for coal-fired electricity in model grid box  $i$
- $E_{SO_2,i}$ : SO<sub>2</sub> emissions from coal-fired electricity generation in model grid box  $i$
- $E_{CO_2,i}$ : CO<sub>2</sub> emissions from coal-fired electricity generation in model grid box  $i$
- $E_{NOx,i}$ : NO<sub>x</sub> emissions from coal-fired electricity generation in model grid box  $i$

63 **Table S2.** Summary of data sources for emissions factors, heat content, and efficiency.

| Category                           | Name                | VALUE | Unit                                   | References |
|------------------------------------|---------------------|-------|----------------------------------------|------------|
| Emissions Factors                  | $EF_{coal}$         | 0.86  | kg (CO <sub>2</sub> )/kwh              | [1]        |
|                                    | $EF_{NG}$           | 0.46  | kg (CO <sub>2</sub> )/kwh              |            |
|                                    | $EC_{coal}$         | 95.35 | kg (CO <sub>2</sub> )/MMBtu            | [2]        |
|                                    | $EC_{NG}$           | 53.07 | kg (CO <sub>2</sub> )/MMBtu            |            |
|                                    | $GWP_{100}$         | 32    | 1CH <sub>4</sub> =32CO <sub>2</sub> eq | [3]        |
| Heat content and Heat rate by fuel | $HC_{coal\_res}$    | 21610 | Btu/kg                                 | [4]        |
|                                    | $HC_{coal\_pow}$    | 14959 | Btu/kg                                 |            |
|                                    | $HC_{NG\_pow}$      | 36100 | Btu/m <sup>3</sup>                     |            |
|                                    | $HC_{NG\_res}$      | 36100 | Btu/m <sup>3</sup>                     |            |
|                                    | $HR_{NG}$           | 8578  | Btu/kwh                                | [5]        |
|                                    | $HR_{coal}$         | 10514 | Btu/kwh                                |            |
|                                    | $\rho_{CH4}$        | 0.72  | kg/m <sup>3</sup>                      | [6]        |
| Efficiency                         | $\eta_{electric}$   | 97%   | %                                      | [7]        |
|                                    | $\eta_{gas}$        | 83%   | %                                      |            |
|                                    | $\eta_{coal}$       | 69%   | %                                      |            |
| Transport efficiency & Leakage     | $\rho_{T\&D\ Loss}$ | 93%   | %                                      | [8]        |
|                                    | $R$                 | 3%    | %                                      | [4]        |

64

## S2.2 Potential electricity generation and heat supply from CBM/CMM in each province

We use Equation (1) to estimate potential electricity generation and Equation (2) to estimate the potential heat supply (see Sect. S3.1 for variable definitions and Table S2 for data sources):

$$Elec_i = CMM_i(1 - R) \times HC_{NG_{pow}} / HR_{NG} + CBM_i(1 - R) \times HC_{NG_{pow}} / HR_{NG} \quad (1)$$

$$Heat_i = CMM_i(1 - R) \times HC_{NG_{res}} / 10^6 + CBM_i(1 - R) \times HC_{NG_{res}} / 10^6 \quad (2)$$

## S2.3 GHG emission reduction and coal displacement in each scenario

We use Equation (3) to estimate the total GHG emission changes and Equation (4)-(9) to estimate the carbon dioxide emission changes:

$$\Delta GHG_j = \sum_i CMM_i(1 - R) \times \rho_{NG} \times GWP_{100} + \Delta Carbon_j \quad (3)$$

**POW scenario:** This carbon dioxide reduction occurs when coal is replaced by more efficient natural gas electricity generation.

$$CD_{POW} = \sum_i Elec_i \times HR_{coal} / HC_{coal_{pow}} \quad (4)$$

$$\Delta Carbon_{POW} = (EF_{coal} - EF_{NG}) \times \sum_i Elec_i / 10^9 \quad (5)$$

**RES-GAS scenario:** We replace small household coal stoves with gas stoves, and carbon dioxide emissions decline because these gas stoves are more efficient.

$$CD_{RES\_GAS} = \frac{\sum_i Heat_i \times \eta_{gas}}{\eta_{coal} \times HC_{coal_{res}}} \quad (6)$$

$$\Delta Carbon_{RES-GAS} = \frac{[(CD_{RES\_GAS} \times HC_{coal_{res}} \times EC_{coal}) - \sum_i Heat_i \times EC_{NG}]}{10^9} \quad (7)$$

**RES-ELEC scenario:** Carbon dioxide emissions in the RES-ELEC scenario increase because household electric heaters are less efficient than small household coal stoves.

$$CD_{RES-ELEC} = \frac{\sum_i Elec_i \times (1 - \rho_{T\&D\ loss}) \times 3412 \times \eta_{elec}}{\eta_{coal} \times HC_{coal\_res}} \quad (8)$$

$$\Delta Carbon_{RES-ELEC} = \frac{[(CD_{RES-ELEC} \times HC_{coal\_res} \times EC_{coal}) - \sum_i Elec_i \times EF_{NG}]}{10^9} \quad (9)$$

#### S2.4 Equations for coal-fired power plant displacement in the *POW* scenarios

We determine the most polluting, existing coal power plants (CPPs) in 13 northern provinces and replace those plants with electricity generated from CBM/CMM in the POW scenario. We identify model grid boxes with coal electricity generation in the Global Power Emissions Database (GPED) <sup>1</sup> that have the highest effective emission factors. We use the following equation to order GPED model grid boxes from highest to lowest effective emissions factor:

$$EF_{eff,i} = \frac{E_{SO_2,i}}{E_{CO_2,i}} + \frac{E_{NOx,i}}{E_{CO_2,i}} \quad (10)$$

We displace coal power production from the grid boxes from highest to lowest effective emissions factor with CBM/CMM-generated electricity until we have depleted all available CBM/CMM for the given province.

#### S2.5 Coal home heating displacement in the RES-GAS and RES-ELEC scenarios

The MEIC inventory provides an estimate of overall residential emissions but not heating specific emissions. However, we can approximate home heating emissions by examining the differences between summer and winter residential emissions. We first calculate the difference between residential emissions in each month that would have home heating activities (October,

November, December, January, February, and March) and average residential emissions in June and July. This setup assumes the difference in residential emissions between summer and winter months is due to home heating. Other types of residential emissions (i.e., cooking) are unlikely to vary seasonally, and seasonal differences in residential emissions are likely a good proxy for home heating. Subsequently, we reduce overall residential heating emissions in each province proportional to the amount of heating that can be supplied with available CBM/CMM resources in each province (Table S3).

**Table S3.** Displaced home heating-related emissions by province in the RES-GAS and RES-ELEC scenarios

| Province       | Removed heating-related emissions during heating season (%) |          |         |          |
|----------------|-------------------------------------------------------------|----------|---------|----------|
|                | 2020FYP                                                     |          | 2020NEA |          |
|                | RES-GAS                                                     | RES-ELEC | RES-GAS | RES-ELEC |
| Shanxi         | 100%                                                        | 66%      | 100%    | 100%     |
| Henan          | 61%                                                         | 3%       | 100%    | 41%      |
| Anhui          | 13%                                                         | 6%       | 11%     | 5%       |
| Heilongjiang   | 1%                                                          | -        | 33%     | -        |
| Liaoning       | 2%                                                          | 1%       | 3%      | 2%       |
| Shaanxi        | 4%                                                          | 2%       | 35%     | 16%      |
| Inner-Mongolia | 1%                                                          | -        | 17%     | 8%       |
| Gansu          | 2%                                                          | 1%       | 2%      | 1%       |



**S3 Description of the GEOS-Chem model and the simulated PM<sub>2.5</sub> in base case and each utilization scenario**

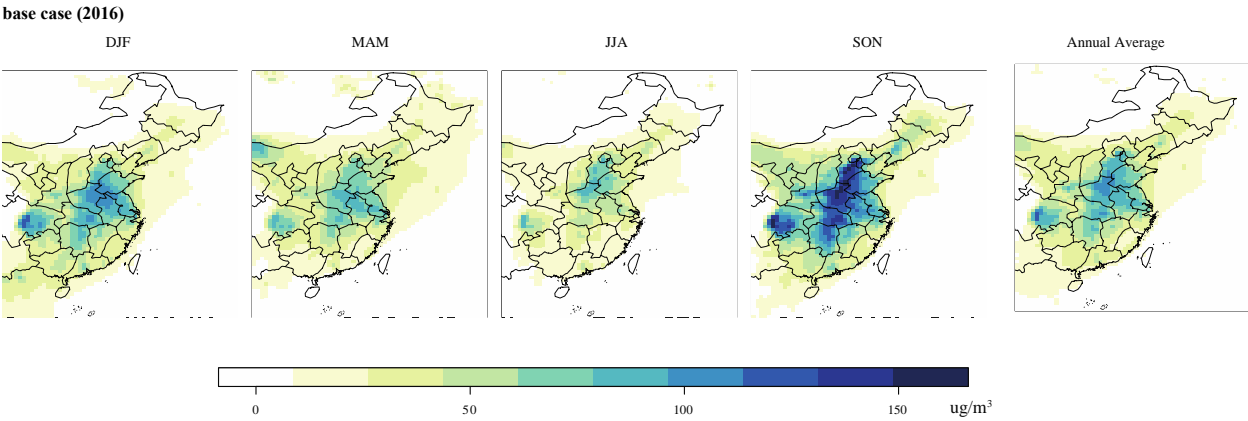

**Figure S1.** 2016 base case seasonal and annual mean surface PM<sub>2.5</sub> concentrations (unit:  $\mu\text{g}/\text{m}^3$ ).

PM<sub>2.5</sub> concentrations are typically higher in northern and south-central China than in more sparsely populated regions of the country.

2020FYP

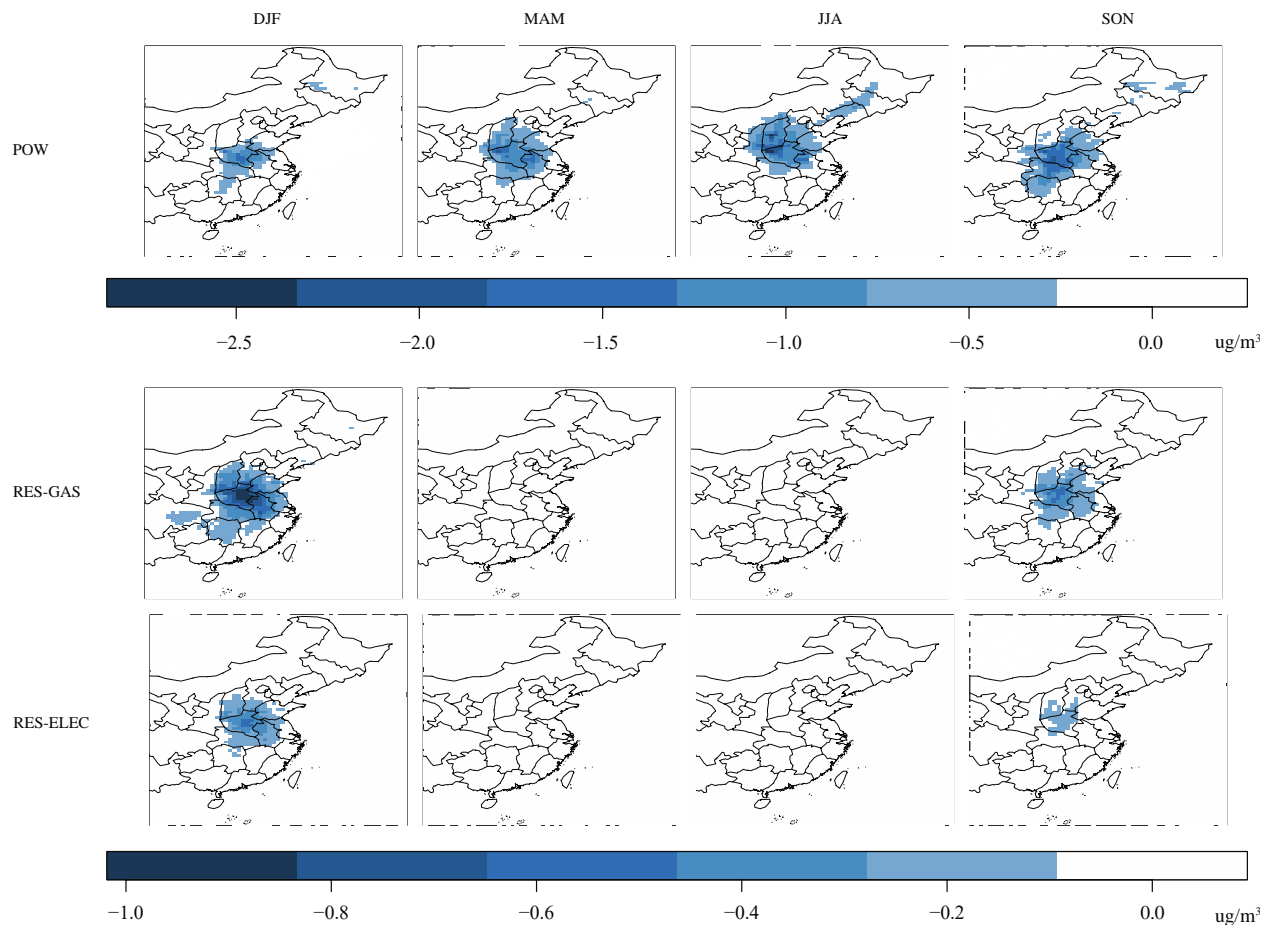

**Figure S2.** Seasonal averaged PM<sub>2.5</sub> reduction (unit:  $\mu\text{g}/\text{m}^3$ ) in the 2020FYP set. (Note: the two residential scenarios share one legend.)

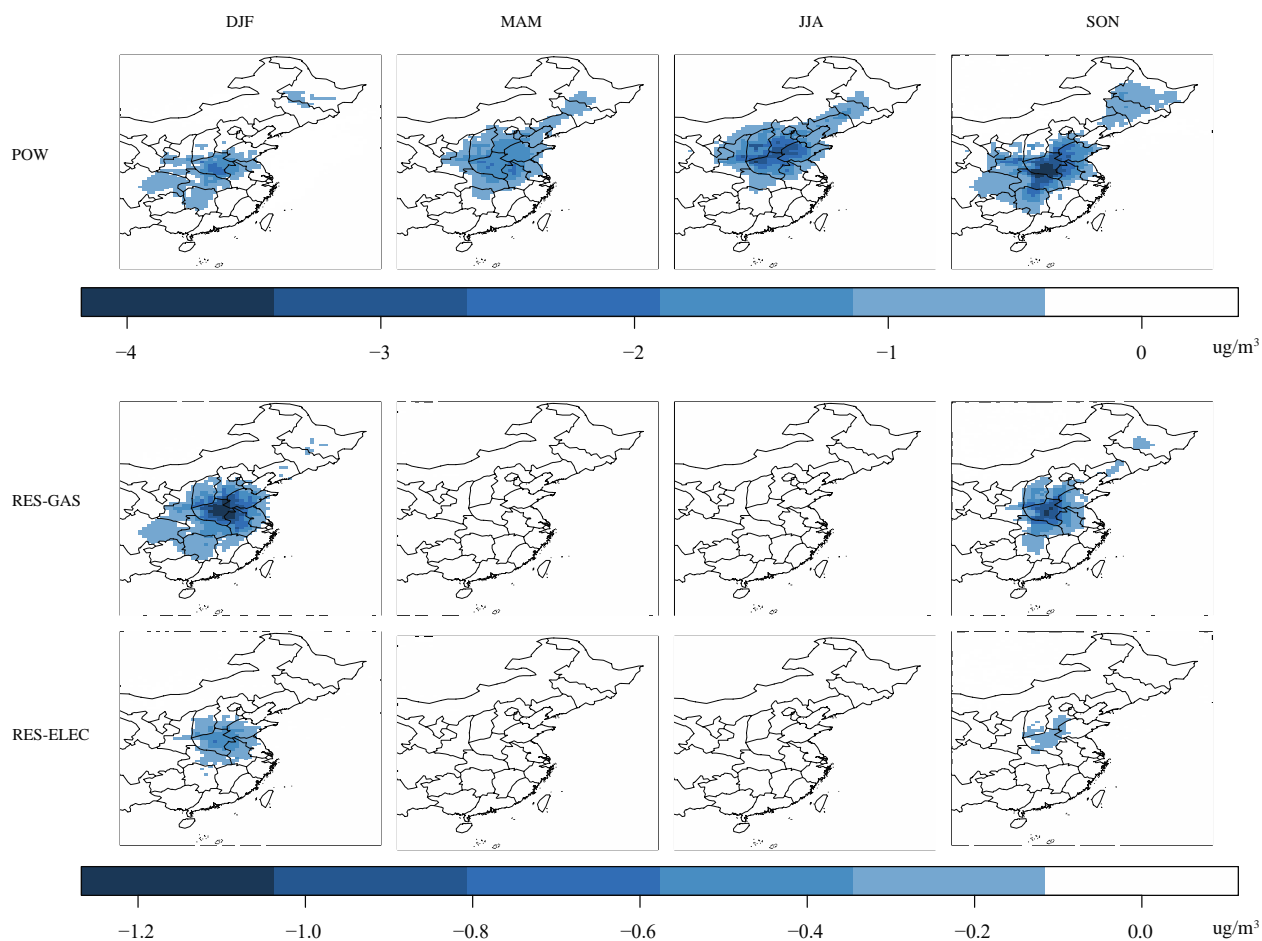

**Figure S3.** Seasonal averaged PM<sub>2.5</sub> reduction (unit:  $\mu\text{g}/\text{m}^3$ ) in the 2020NEA set. (Note: the two residential scenarios share one legend.)

We use nested GEOS-Chem simulations to estimate surface-level ambient PM<sub>2.5</sub> concentrations for each scenario. We first create global GEOS-Chem simulations at a relatively coarse  $4^\circ$  latitude by  $5^\circ$  longitude resolution and use these global simulations as a boundary condition for nested East Asia simulations at a much higher resolution of  $0.5^\circ$  latitude by  $0.625^\circ$  longitude. Note that we spin up the model for two months to create initial conditions for both the global and nested East Asia grids, similar to existing GEOS-Chem studies for the East Asia model domain<sup>6</sup>. Both global and nested simulations are driven by assimilated meteorology from NASA's

MERRA-2 (Modern-Era Retrospective analysis for Research and Applications, Version 2)<sup>9</sup>. In addition, the simulations in this study have a 5-minute dynamical timestep and 10-minute chemistry timestep for multiple emission species and aerosols. The lowest vertical level in the model is approximately 100-m high and is used to represent the surface PM<sub>2.5</sub> concentrations in this study. We subsequently use monthly-averaged surface PM<sub>2.5</sub> estimated by GEOS-Chem for the health impact analysis (Sect. S10).

GEOS-Chem simulations over China have been evaluated by several existing studies. Wang et al., 2013, 2014<sup>10,11</sup>; Lou et al., 2014<sup>12</sup>; and Wang et al., 2013<sup>10</sup> indicated that the GEOS-Chem model performed well in simulating sulfate distributions and concentrations. Wang et al., 2014<sup>11</sup> further evaluated the model performance in reproducing the concentrations and the spatiotemporal patterns of PM<sub>2.5</sub> over China during a severely polluted month in January 2013. The model shows a good correlation with PM<sub>2.5</sub> spatial distribution and concentration with observation, and only underestimated the concentrations of PM<sub>2.5</sub> and sulfate over northern China during a severe haze period ( $> 500 \mu\text{g}/\text{m}^3$ ). In this study, we used emissions data (MEIC) for the year 2016, and the data show that the NO<sub>x</sub> and SO<sub>2</sub> emissions have dramatically decreased from 2012 to 2016 by 70% and 50%, respectively. Thus, combining with the results from other studies above, we believe that the GEOS-Chem model performs well in simulating the spatial distribution and concentration level of PM<sub>2.5</sub> over China using the anthropogenic emission data for the year 2016.

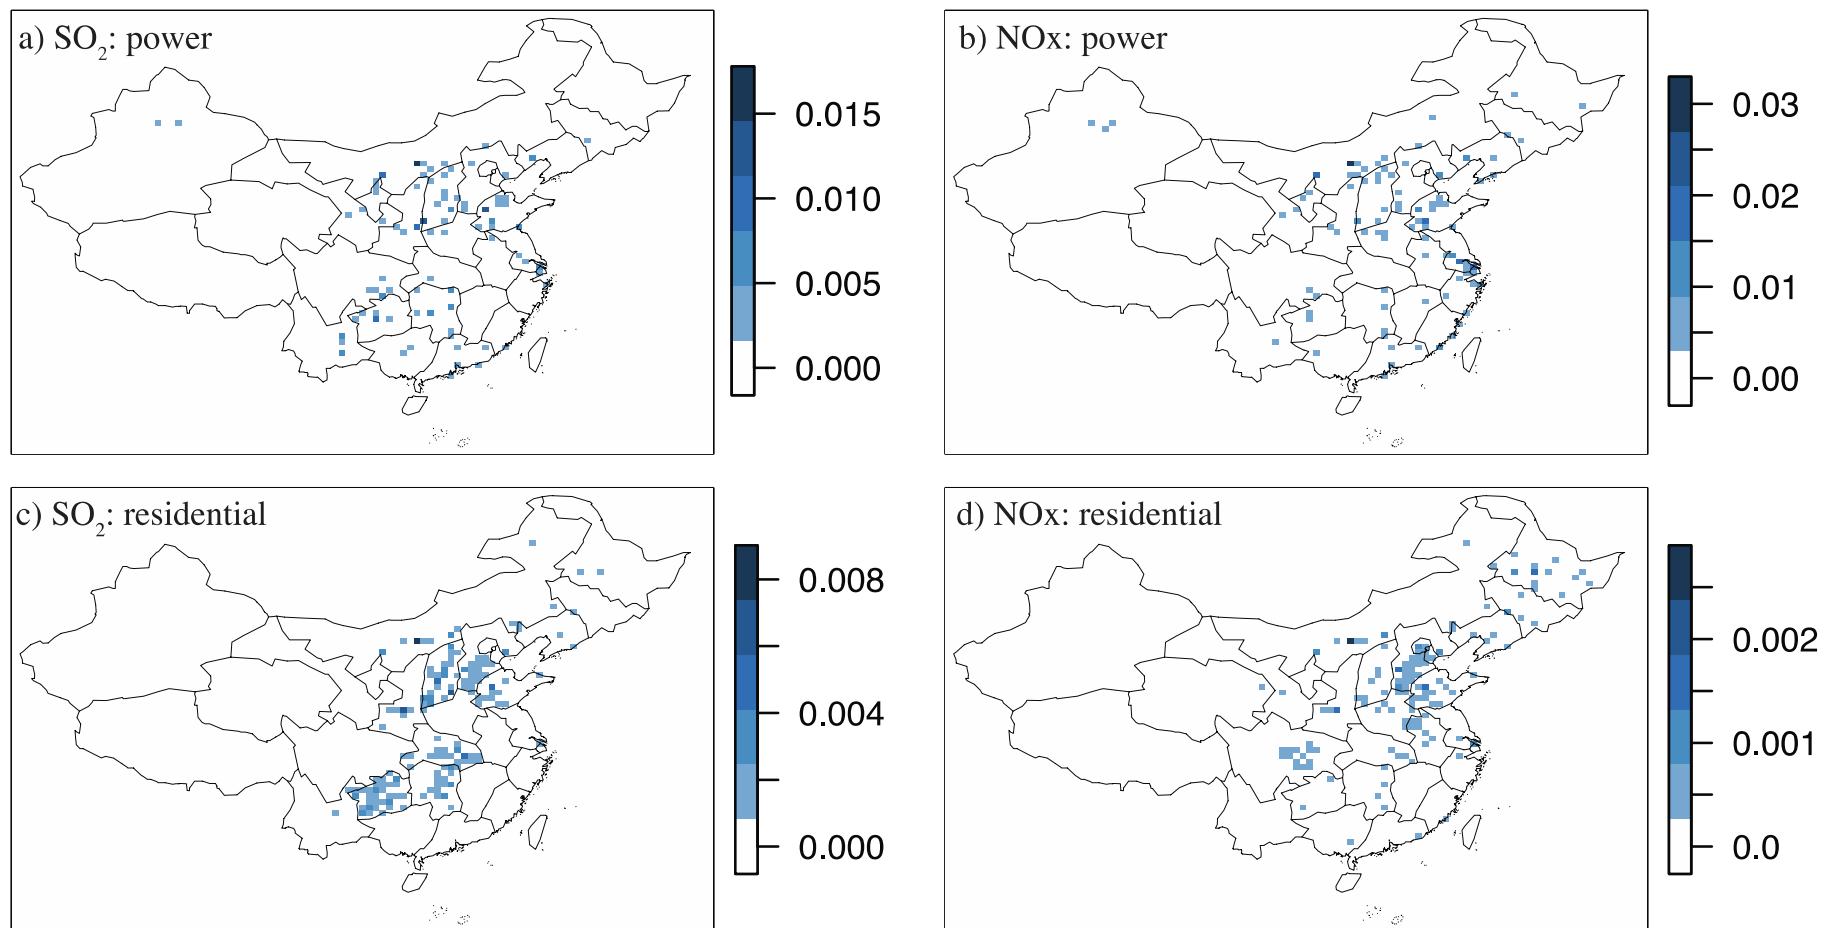

158

159 **Figure S4.** Gridded annual 2016 NO<sub>x</sub> and SO<sub>2</sub> emissions in the base case power sector and residential sector (Unit: kg/m<sup>2</sup> yr). The NO<sub>x</sub>  
 160 and SO<sub>2</sub> emissions data are from MEIC inventory for the year 2016.

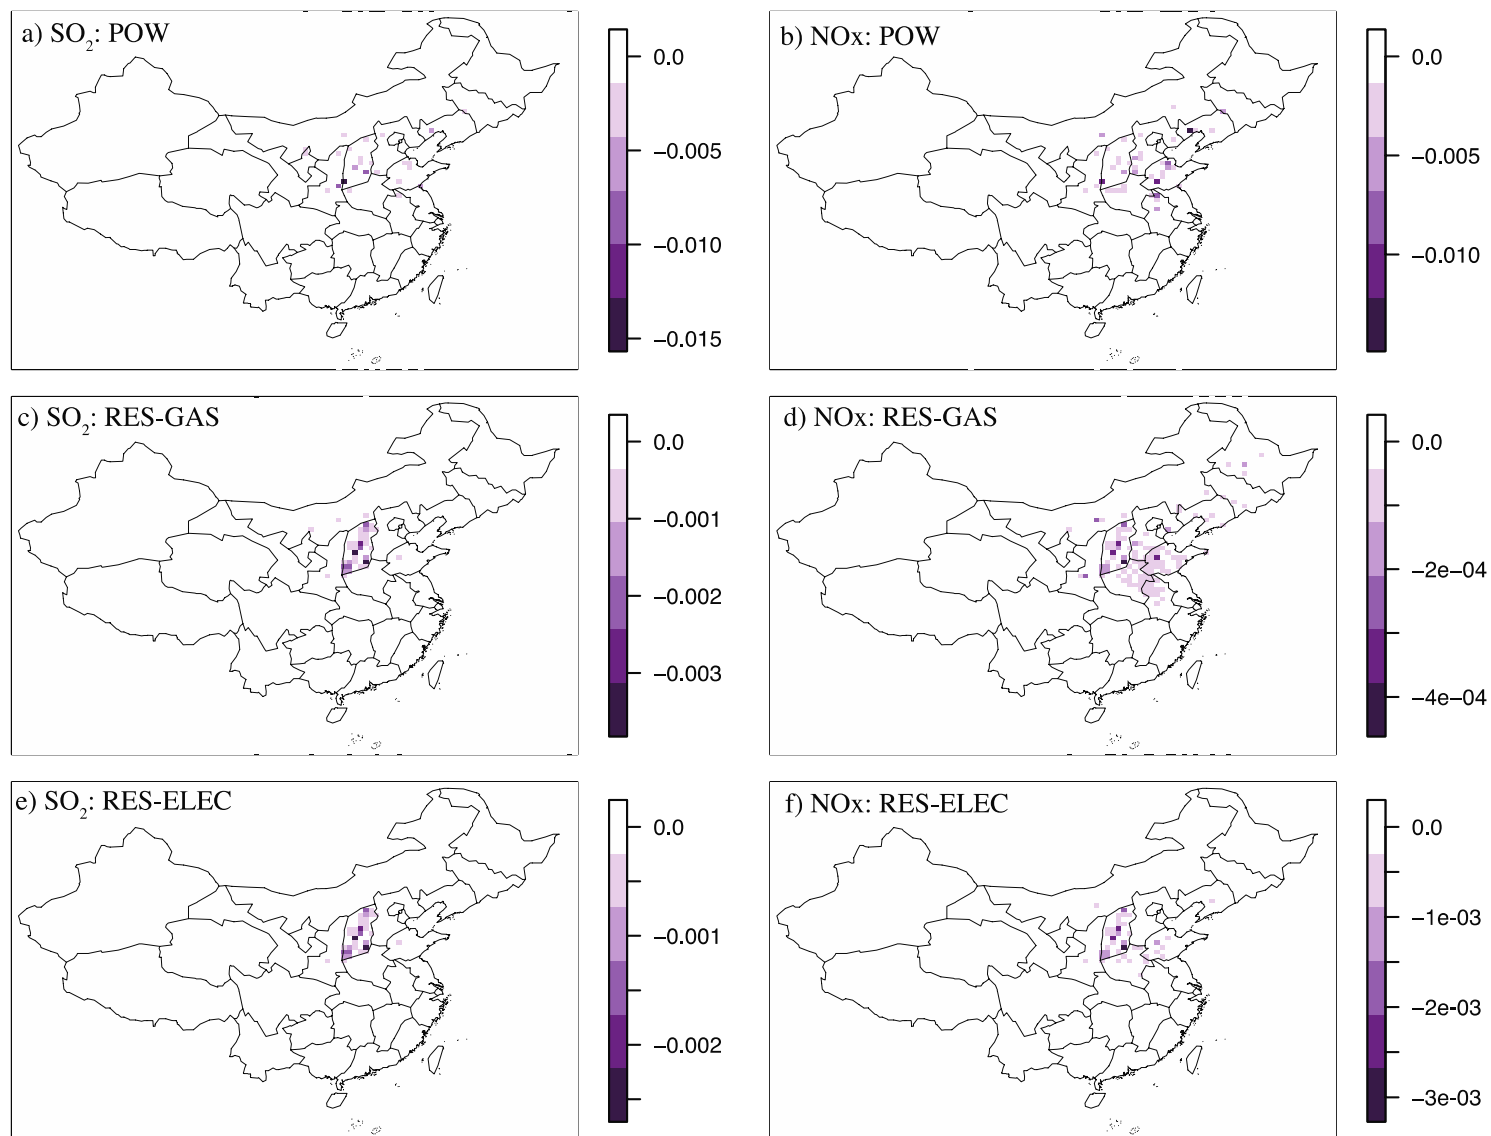

161

162 **Figure S5.** Gridded annual 2016 NO<sub>x</sub> and SO<sub>2</sub> emission reductions in each 2020NEA scenario (Unit: kg/m<sup>2</sup> yr).

#### S4 Analysis of health impacts

We calculate reduced mortality by province from air quality changes resulting from each scenario using the following equation from the Global Burden of Disease (GBD) study<sup>13</sup>:

$$\Delta Mortality_{d,i} = MR_{d,base} \times POP_i \times \left( \frac{RR_{d,i}(C_s)}{RR_{d,i}(C_{base})} - 1 \right) \quad (12)$$

**Table S4.** Summary of data for health impacts analysis

| Variables                                  | Definition                                                                                                                                                                              | Data source           |
|--------------------------------------------|-----------------------------------------------------------------------------------------------------------------------------------------------------------------------------------------|-----------------------|
| $MR_{d, base}$                             | Baseline mortality for a disease ( $d$ ) in the total adult population                                                                                                                  | [13]                  |
| $Pop_i$                                    | Adult population aged 25 and above in each province $i$ in                                                                                                                              | [4]                   |
| $RR_{d,i}(C_s)$ and $RR_{d,i}(C_{base})$ : | Relative risks (RR) of disease $d$ in province $i$ for the adult population at the PM <sub>2.5</sub> levels of $C_s$ in scenario $s$ and $C_{base}$ in the base case, respectively.     | [13]                  |
| $C_s$ and $C_{base}$                       | Annual mean exposures in scenario $s$ and the base case. This exposure is given by the 12-month average of the population-weighted, province-averaged PM <sub>2.5</sub> concentrations. | GEOS-Chem simulations |

Note: We use RR functions from the Global Burden of Disease study<sup>13</sup>, and the concave relative risk functions are used in the main results.

First, we estimate county-averaged  $PM_{2.5}$  concentrations by averaging the concentrations for all the GEOS-Chem grids located within that county. Second, we calculate population-weighted, provincial-averaged  $PM_{2.5}$  concentrations by weighting the  $PM_{2.5}$  concentrations for each county within that province by the ratio of county total population to provincial total population. The county-level age and spatial distributions of the population within each province are from the 2010 China county-level census data<sup>14</sup>.

For household indoor air pollution, we also use equation 12 but in a simplified form. The average user of solid fuels for cooking/heating is exposed to indoor  $PM_{2.5}$  concentrations of 300  $\mu g/m^3$  for traditional coal stoves, and 70 for modern stoves.<sup>15,16</sup> We then use these two numbers to derive the relevant risk for each scenarios and diseases. The exposed population is given by the number of people using coal for home heating in the base case and each utilization scenario.

We also calculate the uncertainty range (95% confidence interval (CI)) of avoided mortalities for each scenario using the GBD model, and that model includes a relative risk function and CI for each disease. Our uncertainty ranges are asymmetrical because the CIs on each relative risk function provided by the GBD is asymmetrical. Furthermore, the  $PM_{2.5}$  model outputs are treated as deterministic because GEOS-Chem does not provide any uncertainty bound on the  $PM_{2.5}$  model output. Thus, our uncertainty range do not include the uncertainty of GEOS-Chem modeled  $PM_{2.5}$ .



## REFERENCES

- (1) Tong, D.; Zhang, Q.; Davis, S. J.; Liu, F.; Zheng, B.; Geng, G.; Xue, T.; Li, M.; Hong, C.; Lu, Z.; Streets, D. G.; Guan, D.; He, K. Targeted emission reductions from global super-polluting power plant units. *Nature Sustainability* **2018**, *1* (1), 59–68.
- (2) *Carbon Dioxide Emissions Coefficients*; U.S. Energy Information Administration, 2016; [https://www.eia.gov/environment/emissions/co2\\_vol\\_mass.php](https://www.eia.gov/environment/emissions/co2_vol_mass.php).
- (3) Climate change 2013: The physical science basis; Stocker, T. F.; Qin, D.; Plattner, G. K.; Tignor, M.; Allen, S. K., 2013; [http://www.climatechange2013.org/images/report/WG1AR5\\_Frontmatter\\_FINAL.pdf](http://www.climatechange2013.org/images/report/WG1AR5_Frontmatter_FINAL.pdf).
- (4) *China statistical yearbook (2018)*; National Bureau of Statistics of China, 2018; <http://www.stats.gov.cn/tjsj/ndsj/2018/indexeh.htm>.
- (5) *Electric Power Annual (2019)*; U.S. Energy Information Administration, 2019; <https://www.eia.gov/electricity/annual/customersales-map3.php>
- (6) *International Energy Outlook 2016*; U.S. Energy Information Administration (EIA), 2017; [https://www.eia.gov/outlooks/ieo/pdf/0484\(2016\).pdf](https://www.eia.gov/outlooks/ieo/pdf/0484(2016).pdf).
- (7) Ding, Y.; Han, W.; Chai, Q.; Yang, S.; Shen, W. Coal-based synthetic natural gas (SNG): A solution to China's energy security and CO<sub>2</sub> reduction? *Energy Policy* **2013**, *55*, 445–453.
- (8) *Annual Statistics of China Power Industry 2015*; China Electricity Council Development and Planning Department, 2016.
- (9) Gelaro, R.; McCarty, W.; Suárez, M. J.; Todling, R.; Molod, A.; Takacs, L.; Randles, C. A.; Darmenov, A.; Bosilovich, M. G.; Reichle, R.; Wargan, K.; Coy, L.; Cullather, R.; Draper, C.;

211 Akella, S.; Buchard, V.; Conaty, A.; da Silva, A. M.; Gu, W.; Kim, G.-K.; Koster, R.; Lucchesi,  
 212 R.; Merkova, D.; Nielsen, J. E.; Partyka, G.; Pawson, S.; Putman, W.; Rienecker, M.; Schubert, S.  
 213 D.; Sienkiewicz, M.; Gelaro, R.; McCarty, W.; Suárez, M. J.; Todling, R.; Molod, A.; Takacs, L.;  
 214 Randles, C. A.; Darmenov, A.; Bosilovich, M. G.; Reichle, R.; Wargan, K.; Coy, L.; Cullather, R.;  
 215 Draper, C.; Akella, S.; Buchard, V.; Conaty, A.; da Silva, A. M.; Gu, W.; Kim, G.-K.; Koster, R.;  
 216 Lucchesi, R.; Merkova, D.; Nielsen, J. E.; Partyka, G.; Pawson, S.; Putman, W.; Rienecker, M.;  
 217 Schubert, S. D.; Sienkiewicz, M.; B, Zhao. The Modern-Era Retrospective Analysis for Research  
 218 and Applications, Version 2 (MERRA-2). *Journal of Climate* **2017**, *30* (14), 5419–5454.

219 (10) Wang, Y.; Zhang, Q. Q.; He, K.; Zhang, Q.; Chai, L. Sulfate-nitrate-ammonium aerosols  
 220 over China: response to 2000–2015 emission changes of sulfur dioxide, nitrogen oxides, and  
 221 ammonia. *Atmospheric Chemistry and Physics* **2013**, *13* (5), 2635–2652.

222 (11) Wang, Y.; Zhang, Q.; Jiang, J.; Zhou, W.; Wang, B.; He, K.; Duan, F.; Zhang, Q.; Philip,  
 223 S.; Xie, Y. Enhanced sulfate formation during China's severe winter haze episode in January 2013  
 224 missing from current models. *Journal of Geophysical Research: Atmospheres* **2014**, *119* (17), 10,  
 225 425–10, 440.

226 (12) Lou, S.; Liao, H.; Zhu, B. Impacts of aerosols on surface-layer ozone concentrations in  
 227 China through heterogeneous reactions and changes in photolysis rates. *Atmospheric Environment*  
 228 **2014**, *85*, 123–138.

229 (13) Burnett, R.; Chen, H.; Szyszkowicz, M.; Fann, N.; Hubbell, B.; Pope, C. A.; Apte, J. S.;  
 230 Brauer, M.; Cohen, A.; Weichenthal, S.; Coggins, J.; Di, Q.; Brunekreef, B.; Frostad, J.; Lim, S.  
 231 S.; Kan, H.; Walker, K. D.; Thurston, G. D.; Hayes, R. B.; Lim, C. C.; Turner, M. C.; Jerrett, M.;  
 232 Krewski, D.; Gapstur, S. M.; Diver, W. R.; Ostro, B.; Goldberg, D.; Crouse, D. L.; Martin, R. V.;

233 Peters, P.; Pinault, L.; Tjepkema, M.; van Donkelaar, A.; Villeneuve, P. J.; Miller, A. B.; Yin, P.;  
234 Zhou, M.; Wang, L.; Janssen, N. A. H.; Marra, M.; Atkinson, R. W.; Tsang, H.; Thach, T. Q.;  
235 Cannon, J. B.; Allen, R. T.; Hart, J. E.; Laden, F.; Cesaroni, G.; Forastiere, F.; Weinmayr, G.;  
236 Jaensch, A.; Nagel, G.; Concin, H.; Spadaro, J. V. Global estimates of mortality associated with  
237 long-term exposure to outdoor fine particulate matter. *Proc. Natl. Acad. Sci. USA* **2018**, *115* (38),  
238 9592–9597.

239 (14) *China census data by county, 2000-2010*; All China Marketing Research Co. Ltd., 2014;  
240 <https://chinadatacenter.net/Data/ServiceContent.aspx?id=1620>.

241 (15) Balakrishnan, K.; Ghosh, S.; Ganguli, B.; Sambandam, S.; Bruce, N.; Barnes, D. F.; Smith,  
242 K. R. State and national household concentrations of PM 2.5 from solid cookfuel use: Results from  
243 measurements and modeling in India for estimation of the global burden of disease. *Environ Health*  
244 **2013**, *12* (1), 1–14.

245 (16) Larsen, B.; Holland, M.; Jeuland, M. Benefits and Costs of the Air Pollution Targets for  
246 the Post-2015 Development Agenda, **2014**. <https://ssrn.com/abstract=2685661>.
